# Supplementary material for: Double-strand breaks in facultative heterochromatin require specific movements and chromatin changes for efficient repair
Source: PubMed Central journal article supplement (PMC11487122; doi:10.1038/s41467-024-53313-2), 2024-10-17
Supplement: 41467_2024_53313_MOESM3_ESM.pdf [file 41467_2024_53313_MOESM3_ESM.pdf]

## Reporting Summary

Nature Portfolio wishes to improve the reproducibility of the work that we publish. This form provides structure for consistency and transparency in reporting. For further information on Nature Portfolio policies, see our [Editorial Policies](#) and the [Editorial Policy Checklist](#).

### Statistics

For all statistical analyses, confirm that the following items are present in the figure legend, table legend, main text, or Methods section.

- | n/a                                 | Confirmed                                                                                                                                                                                                                                                                                      |
|-------------------------------------|------------------------------------------------------------------------------------------------------------------------------------------------------------------------------------------------------------------------------------------------------------------------------------------------|
| <input type="checkbox"/>            | <input checked="" type="checkbox"/> The exact sample size ( $n$ ) for each experimental group/condition, given as a discrete number and unit of measurement                                                                                                                                    |
| <input type="checkbox"/>            | <input checked="" type="checkbox"/> A statement on whether measurements were taken from distinct samples or whether the same sample was measured repeatedly                                                                                                                                    |
| <input type="checkbox"/>            | <input checked="" type="checkbox"/> The statistical test(s) used AND whether they are one- or two-sided<br><i>Only common tests should be described solely by name; describe more complex techniques in the Methods section.</i>                                                               |
| <input checked="" type="checkbox"/> | <input type="checkbox"/> A description of all covariates tested                                                                                                                                                                                                                                |
| <input checked="" type="checkbox"/> | <input type="checkbox"/> A description of any assumptions or corrections, such as tests of normality and adjustment for multiple comparisons                                                                                                                                                   |
| <input type="checkbox"/>            | <input checked="" type="checkbox"/> A full description of the statistical parameters including central tendency (e.g. means) or other basic estimates (e.g. regression coefficient) AND variation (e.g. standard deviation) or associated estimates of uncertainty (e.g. confidence intervals) |
| <input type="checkbox"/>            | <input checked="" type="checkbox"/> For null hypothesis testing, the test statistic (e.g. $F$ , $t$ , $r$ ) with confidence intervals, effect sizes, degrees of freedom and $P$ value noted<br><i>Give <math>P</math> values as exact values whenever suitable.</i>                            |
| <input checked="" type="checkbox"/> | <input type="checkbox"/> For Bayesian analysis, information on the choice of priors and Markov chain Monte Carlo settings                                                                                                                                                                      |
| <input checked="" type="checkbox"/> | <input type="checkbox"/> For hierarchical and complex designs, identification of the appropriate level for tests and full reporting of outcomes                                                                                                                                                |
| <input checked="" type="checkbox"/> | <input type="checkbox"/> Estimates of effect sizes (e.g. Cohen's $d$ , Pearson's $r$ ), indicating how they were calculated                                                                                                                                                                    |

*Our web collection on [statistics for biologists](#) contains articles on many of the points above.*

### Software and code

Policy information about [availability of computer code](#)

**Data collection** DeltaVision microscope (DeltaVision Spectris; Applied Precision, LLC) and LD C-Apochromat 63x/1.15 W Korr M27 objective on a LSM880 microscope with Airyscan (Zeiss) were used for image acquisition. Quantitative PCR analyses were performed using Bio-Rad CFX96 Touch Real-Time PCR qPCR system.

**Data analysis** Image J was used for image analyses. Graphpad Prism (versions 6 to 9) was used for statistical analyses. Software to analyze repair junctions was described in <https://academic.oup.com/nargab/article/4/3/lqac063/6691859>. Online tool to analyze repair junctions available on: <https://siq.researchlumc.nl/SIQPlotter/>

For manuscripts utilizing custom algorithms or software that are central to the research but not yet described in published literature, software must be made available to editors and reviewers. We strongly encourage code deposition in a community repository (e.g. GitHub). See the Nature Portfolio [guidelines for submitting code & software](#) for further information.

## Data

Policy information about [availability of data](#)

All manuscripts must include a [data availability statement](#). This statement should provide the following information, where applicable:

- Accession codes, unique identifiers, or web links for publicly available datasets
- A description of any restrictions on data availability
- For clinical datasets or third party data, please ensure that the statement adheres to our [policy](#)

All data generated are included in this article and its supplementary information. The raw targeted sequencing data generated for this study have been deposited in the NCBI SRA database under accession code PRJNA1132713

## Research involving human participants, their data, or biological material

Policy information about studies with [human participants or human data](#). See also policy information about [sex, gender \(identity/presentation\), and sexual orientation](#) and [race, ethnicity and racism](#).

|                                                                    |      |
|--------------------------------------------------------------------|------|
| Reporting on sex and gender                                        | n.a. |
| Reporting on race, ethnicity, or other socially relevant groupings | n.a. |
| Population characteristics                                         | n.a. |
| Recruitment                                                        | n.a. |
| Ethics oversight                                                   | n.a. |

Note that full information on the approval of the study protocol must also be provided in the manuscript.

## Field-specific reporting

Please select the one below that is the best fit for your research. If you are not sure, read the appropriate sections before making your selection.

Life sciences       Behavioural & social sciences       Ecological, evolutionary & environmental sciences

For a reference copy of the document with all sections, see [nature.com/documents/nr-reporting-summary-flat.pdf](https://nature.com/documents/nr-reporting-summary-flat.pdf)

## Life sciences study design

All studies must disclose on these points even when the disclosure is negative.

|                 |                                                                                                                                                                                                                                                                                                                                                                                                                                                  |
|-----------------|--------------------------------------------------------------------------------------------------------------------------------------------------------------------------------------------------------------------------------------------------------------------------------------------------------------------------------------------------------------------------------------------------------------------------------------------------|
| Sample size     | Samples sizes were chosen in excess to show a significant effect based on pilot experiments used to determine mean and spread. For analyses of microscopy images, a minimum sample size of 20-30 cells per condition was used. For repair pathway analyses using Sanger sequencing and TIDE analyses, a minimum sample size of 5 larvae per condition was used. For ChIP analyses, at least 3 biological replicates were included per condition. |
| Data exclusions | No data were excluded from this study.                                                                                                                                                                                                                                                                                                                                                                                                           |
| Replication     | All experiments have been biologically replicated at least 3 times. The number of replicates has been indicated in all figure legends.                                                                                                                                                                                                                                                                                                           |
| Randomization   | No experiments were performed where samples could or should be assigned randomly to a treatment group. Therefore, no group randomization was needed for this study.                                                                                                                                                                                                                                                                              |
| Blinding        | Investigators were not blinded to group allocation. This was not essential, because the nuclei to be analyzed were selected based on the presence of DNA damage in or outside polycomb domains, which is a similar starting point for all images.                                                                                                                                                                                                |

## Reporting for specific materials, systems and methods

We require information from authors about some types of materials, experimental systems and methods used in many studies. Here, indicate whether each material, system or method listed is relevant to your study. If you are not sure if a list item applies to your research, read the appropriate section before selecting a response.

## Materials &amp; experimental systems

## Methods

- n/a Involved in the study
- Antibodies
- Eukaryotic cell lines
- Palaeontology and archaeology
- Animals and other organisms
- Clinical data
- Dual use research of concern
- Plants

- n/a Involved in the study
- ChIP-seq
- Flow cytometry
- MRI-based neuroimaging

## Antibodies

## Antibodies used

mouse anti-yH2Av (Developmental Studies Hybridoma Bank, UNC93-5.2.1), 1:250 for immunofluorescence, 5ug for ChIP  
 rabbit anti-H3K27me3 (Invitrogen, MA5-11198), 5ug for ChIP  
 rabbit anti-H2AK119Ub (Cell Signaling, 8240S), 5ug for ChIP  
 rabbit anti-H3K9me3 (Abcam, 176916), 5ug for ChIP  
 rabbit anti-H3 (Abcam, ab1791), 5ug for ChIP  
 chicken anti-mCherry (abcam, ab205402), 1:1000 dilution for immunofluorescence  
 rabbit anti-Rad51 (gift from Irene Chiolo, USC). 1:500 dilution for immunofluorescence  
 Alexa 488 goat anti-rabbit Invitrogen 1:600 for immunofluorescence (A11029)  
 Alexa 568 goat anti-chicken Invitrogen 1:600 for immunofluorescence (A11041)  
 Alexa 647 goat anti-rabbit Invitrogen 1:600 for immunofluorescence (A21245)

## Validation

All antibodies purchased from commercial vendors have validation information on their website.  
 Epicpypher SNAP-ChIP K-MetStat panel (19-1001) was used to validate the specificity of the H3K27me3 antibody used for ChIP.  
 yH2Av antibody specificity was determined by observing increased signals using ChIP-qPCR upon single DSB induction in larval tissue.  
 Rad51 antibody specificity was determined by co-localization with yH2Av at later timepoints (>60 min) following DSB induction. The antibody has previously also been extensively validated by the labs of Dr. Kadonaga, Dr. Chiolo and Dr. Karpen.

## Eukaryotic cell lines

Policy information about [cell lines and Sex and Gender in Research](#)

## Cell line source(s)

Kc and S2 wildtype cells were ordered from DGRC: <https://dgrc.bio.indiana.edu/Home>

## Authentication

Kc and S2 lines were authenticated by DGRC upon purchase

## Mycoplasma contamination

Cell lines used are negative for mycoplasma (tested 1x per 3 months)

Commonly misidentified lines  
(See [ICLAC](#) register)

No commonly misidentified cell lines were used in this study

## Animals and other research organisms

Policy information about [studies involving animals](#); [ARRIVE guidelines](#) recommended for reporting animal research, and [Sex and Gender in Research](#)

## Laboratory animals

DR-white 3eu\_1- Janssen laboratory (Janssen et al., 2016)  
 DR-white 3eu\_2- generated in this study  
 DR-white 2fH\_1- generated in this study  
 DR-white 3fH\_1- generated in this study  
 DR-white 3fH\_2- generated in this study  
 DR-white 2het\_1 - Janssen laboratory (Janssen et al., 2016)  
 DR-white 3het\_1 - Janssen laboratory (Janssen et al., 2016)  
 ecDHFR-I-Sce - Janssen laboratory (Janssen et al., 2016)  
 hsp70.HA.I-Sce (hsp.I-Sce) - Jan LaRocque (Do et al., 2014)  
 mu2-eYFP - Janssen laboratory (Janssen et al., 2016)  
 ph-p-mCherry - generated in this study  
 FlyFUCCI - Bloomington #55123  
 UAS:dUtx RNAi - VDRC 105986  
 UAS:ctip RNAi - VDRC 100035  
 UAS:DmKu70 RNAi: BDSC #29594  
 UAS:DmRad51 RNAi: VDRC 13362  
 UAS:luciferase RNAi - Bloomington #31603  
 Act5C-Gal4 - Bloomington #4414 and #3954  
 Da-GAL4 - Bloomington #95282  
 Mei41[29D] - gift from Tin Tin Su  
 dUtx[f01321] - Bloomington #18425

|                         |                                                                                                                                                                                                                                                                                                                                                                                                                  |
|-------------------------|------------------------------------------------------------------------------------------------------------------------------------------------------------------------------------------------------------------------------------------------------------------------------------------------------------------------------------------------------------------------------------------------------------------|
|                         | Age of <i>Drosophila Melanogaster</i> in all experiments: L3 larval stage, except for viability assays in Fig.S8D. In Fig.S8D animals were counted ~1-3 days after eclosion.                                                                                                                                                                                                                                     |
| Wild animals            | n.a.                                                                                                                                                                                                                                                                                                                                                                                                             |
| Reporting on sex        | Sex was not considered in this study, because we find it important that the repair effects we see are sex-independent.                                                                                                                                                                                                                                                                                           |
| Field-collected samples | n.a.                                                                                                                                                                                                                                                                                                                                                                                                             |
| Ethics oversight        | Our <i>Drosophila</i> laboratory facilities, access policies, the handling of gmo materials and the training practices for our personnel are in accordance with the guidelines and requirements issued by the Dutch Ministry of Infrastructure and Water Management. We have fully equipped facilities, both at the BSL1 and BSL2 level, including a facility for the handling of (genetically modified) insects |

Note that full information on the approval of the study protocol must also be provided in the manuscript.

## Plants

|                       |      |
|-----------------------|------|
| Seed stocks           | n.a. |
| Novel plant genotypes | n.a. |
| Authentication        | n.a. |
